# Supplementary material
Source: PubMed Central journal article supplement (PMC11477829)
Supplement: ajcr0014-4113-f4.pdf [file ajcr0014-4113-f4.pdf]

## Challenge of lenvatinib application in HCC

**Supplementary Table 1.** The advances of lenvatinib combination therapy in advanced HCC

| Therapy Regimens                                                    | mOS (months)                   | mPFS (months)             | ORR (%)                   | DCR (%)                   | Efficacy Evaluation   | References |
|---------------------------------------------------------------------|--------------------------------|---------------------------|---------------------------|---------------------------|-----------------------|------------|
| LEN+TACE vs TACE (46 vs 57)                                         | /                              | /                         | 69.57 vs 40.35, (P<0.05)  | /                         | mRECIST               | [37]       |
| LEN+TACE vs TACE (34 vs 32)                                         | /                              | 17.00 vs 14.00, (P=0.510) | 64.7 vs 34.4, (P=0.014)   | 79.4 vs 59.4, (P=0.066)   |                       | [38]       |
| LEN+TACE vs TACE (53 vs 51)                                         | /                              | /                         | 77.36 vs 56.36, (P<0.05)  | 94.34 vs 79.89, (P<0.05)  |                       | [39]       |
| LEN+TACE vs TACE (34 vs 68)                                         | 27.7 vs 18.4, (P=0.043)        | 8.3 vs 4.6, (P=0.008)     | 64.1 vs 36.5, (P=0.002)   | 79.4 vs 69.1, (P=0.272)   |                       | [40]       |
| LEN+TACE vs TACE (60 vs 60)                                         | /                              | /                         | 68.3 vs 31.7, (P<0.001)   | 93.3 vs 86.7, (P<0.224)   |                       | [41]       |
| LEN+TACE vs LEN (170 vs 168)                                        | 17.8 vs 11.5, (P<0.001)        | 10.6 vs 6.4, (P<0.001)    | 54.1 vs 25.0, (P<0.001)   | 94.1 vs 73.2, (P<0.001)   |                       | [43]       |
| LEN+TACE vs LEN (19 vs 19)                                          | not reached vs 16.9, (P=0.007) | 11.6 vs 10.1, (P=0.019)   | 63.2 vs 63.2, (P=1.0)     | 100 vs 100, (P=1.0)       |                       | [44]       |
| LEN+DEB-TACE vs LEN (142 vs 69)                                     | 15.9 vs 8.6, (P=0.0022)        | 8.6 vs 4.4, (P<0.001)     | 46.48 vs 13.05, (P<0.001) | 76.76 vs 56.52, (P<0.001) |                       | [45]       |
| LEN+DEB-TACE vs LEN (78 vs 78)                                      | 8.0 vs 5.0, (P=0.003)          | /                         | 57.7 vs 25.6, (P<0.001)   | 75.6 vs 56.4, (P=0.011)   |                       | [46]       |
| LEN+TACE vs SOR+TACE (25 vs 24)                                     | 13.0 vs 8.0, (P<0.05)          | 10 vs 6.5, (P<0.05)       | 62.8 vs 46.3, (P=0.027)   | 86.0 vs 76.7, (P=0.03)    |                       | [48]       |
| LEN+TACE vs SOR+TACE therapy (59 vs 57)                             | 19.0 vs 10.8, (P=0.022)        | 8.4 vs 7.43, (P=0.081)    | 60.7 vs 38.9, (P=0.022)   | 96.4 vs 96.3, (P>0.05)    |                       | [49]       |
| LEN+TACE vs SOR+TACE therapy (53 vs 59)                             | 30.5 vs 20.5, (P=0.018)        | 10.7 vs 6.0, (P=0.002)    | 54.7 vs 44.1, (P=0.260)   | 81.1 vs 61.0, (P=0.020)   |                       | [50]       |
| LEN+DEB-TACE vs SOR+DEB-TACE (50 vs 100)                            | 14.9 vs 12.3, (P=0.043)        | /                         | 64.0 vs 33.3, (P=0.008)   | 76.0 vs 68.0, (P=0.310)   |                       | [51]       |
| LEN vs ATEZ/BEV (181 vs 177)                                        | /                              | 7.3 vs 10.8, (P=0.019)    | /                         | /                         |                       | [56]       |
| LEN vs ATEZ/BEV (152 vs 152)                                        | 20.2 vs not reached, (P=0.039) | 6.0 vs 8.3, (P=0.005)     | 47.5 vs 44.2, (P=0.440)   | 80.8 vs 88.9, (P=0.013)   |                       | [57]       |
| LEN vs ATEZ/BEV (66 vs 66)                                          | 20.6 vs not reached, (P=0.577) | 5.2 vs 8.8, (P=0.012)     | 52.4 vs 43.8, (P=0.330)   | 82.5 vs 76.6, (P=0.404)   |                       | [58]       |
| LEN vs ATEZ/BEV (170 vs 92)                                         | 17.9 vs 14.0, (P=0.7)          | 6.3 and 7.2, (P=0.2)      | 35.9 vs 33.7, (P=0.8)     | 62.9 vs 63.0, (P=1.0)     |                       | [59]       |
| LEN vs ATEZ/BEV (152 vs 65, with Child-Pugh B)                      | 13.8 vs 8.2, (P=0.005)         | 8.2 vs 6.9, (P=0.8443)    | 35.0 vs 18.0, (P=0.0185)  | 65.0 vs 55.0, (P=0.2213)  |                       | [60]       |
| LEN+TACE vs ATEZ/BEV+TACE (34 vs 34)                                | /                              | 6.03 vs 7.03, (P=0.545)   | 58.8 vs 61.8, (P=0.804)   | 85.3 vs 82.4, (P=0.742)   |                       | [63]       |
| LEN+SBRT vs LEN (37 vs 77)                                          | 19.3 vs 11.2, (P<0.001)        | 10.3 vs 5.3, (P<0.001)    | 56.8 vs 20.8, (P<0.001)   | 91.9 vs 64.9, (P=0.005)   |                       | [73]       |
| LEN+SBRT vs SBRT (35 vs 35)                                         | 16.8 vs 11.0, (P=0.043)        | 9.1 vs 3.7, (P<0.001)     | 54.29 vs 22.86, (P=0.007) | 85.71 vs 46.43, (P=0.005) |                       | [75]       |
| LEN+TACE+RT vs LEN+TACE (51 vs 51, with PVTT)                       | 22.8 vs 17.1, (P=0.031)        | 12.8 vs 10.5, (P=0.035)   | 56.9 vs 51.0, (P=0.551)   | 92.1 vs 90.2, (P=0.727)   |                       | [76]       |
| LEN+PD-1+HAIC vs LEN+PD-1 (89 vs 53, with PVTT)                     | 26.3 vs 13.8, (P<0.001)        | 11.5 vs 5.5, (P<0.001)    | 61.8 vs 20.8, (P<0.001)   | /                         |                       | [82]       |
| LEN+PD-1+HAIC vs LEN+PD-1 (84 vs 86)                                | 17.7 vs 12.6, (P=0.001)        | 10.9 vs 6.8, (P=0.001)    | 59.5 vs 41.9, (P=0.022)   | 88.1 vs 82.6, (P>0.05)    |                       | [83]       |
| LEN+PD-1+HAIC vs LEN+PD-1 (45 vs 25)                                | 15.9 vs 8.6, (P=0.0015)        | 8.8 vs 5.4, (P=0.032)     | 40.0 vs 16.0, (P=0.038)   | 77.6 vs 44.0, (P<0.001)   |                       | [84]       |
| LEN+PD-1+HAIC vs LEN+PD-1 (58 vs 63, TACE-refractory uHCC patients) | 24.0 vs 13.0, (P=0.001)        | 13.0 vs 7.2, (P<0.001)    | 48.3 vs 23.8, (P=0.005)   | 87.9 vs 69.8, (P=0.02)    |                       | [85]       |
| LEN+PD-1+HAIC vs LEN+PD-1+TACE (34 vs 61)                           | 25.0 vs 19.3, (P=0.035)        | 21.74 vs 8.74, (P=0.007)  | 52.9 vs 27.9, (P=0.03)    | 100 vs 88.5, (P=0.001)    | RECIST v.1.1 criteria | [86].      |

## Challenge of lenvatinib application in HCC

|                                                                     |                                    |                             |                              |                              |                          |       |
|---------------------------------------------------------------------|------------------------------------|-----------------------------|------------------------------|------------------------------|--------------------------|-------|
| LEN+PD-1+HAIC vs LEN+HAIC (75 vs 74)                                | 16.0 vs 9.0,<br>(P=0.002)          | 11.0 vs 6.0,<br>(P<0.001)   | 45.33 vs 33.78,<br>(P=0.146) | 78.66 vs 62.12,<br>(P=0.027) | mRECIST                  | [87]  |
| LEN+PD-1+HAIC vs LEN+HAIC (58 vs 87, HAIC refractory uHCC patients) | 43.6 vs 18.9,<br>(P=0.009)         | 35.6 vs 9.4,<br>(P=0.009)   | /                            | /                            |                          | [88]  |
| LEN+PD-1+HAIC+ TAE vs LEN+PD-1+HAIC (50 vs 50)                      | 14.1 vs 11.3,<br>(P=0.041)         | 5.6 vs 4.4,<br>(P=0.037)    | 72.0 vs 52.0,<br>(P=0.039)   | 88.0 vs 76.0,<br>(P=0.118)   |                          | [89]  |
| LEN+PD-1+HAIC vs LEN (71 vs 86)                                     | not reached vs 11,<br>(P<0.001)    | 11.1 vs 5.1,<br>(P<0.001)   | 67.6 vs 13.6,<br>(P<0.001)   | 90.1 vs 72.1,<br>(P=0.005)   |                          | [90]  |
| LEN+HAIC vs HAIC (110 vs 132)                                       | /                                  | 19.4 vs 16.1,<br>(P=0.092)  | /                            | /                            |                          | [93]  |
| LEN+HAIC+ sequential ablation vs LEN+HAIC (53 vs 97)                | 30.0 vs 13.6,<br>(P=0.010)         | 12.8 vs 5.6,<br>(P<0.001)   | /                            | /                            |                          | [95]  |
| LEN vs HAIC (52 vs 52)                                              | 7.9 vs 10.8,<br>(P=0.106)          | 4.0 vs 3.6,<br>P=0.706      | 23.1 vs 28.8,<br>(P=0.502)   | 51.9 vs 73.1,<br>(P=0.026)   | RECIST v1.1<br>criteria  | [96]  |
| LEN vs PD-1+HAIC (65 vs 53)                                         | 10.1 vs 17.1,<br>(P=0.005)         | 4.8 vs 9.3,<br>(P=0.006)    | 9.2 vs 47.2,<br>(P<0.001)    | 69.2 vs 86.8,<br>(P=0.002)   |                          | [97]  |
| LEN+PD-1 vs LEN+ placebo (395 vs 399)                               | 21.2 vs 19.0,<br>(P=0.023)         | 8.2 vs 8.0,<br>(P=0.047)    | 26.1 vs 17.5                 | 81.3 vs 78.4                 |                          | [106] |
| LEN+PD-1 group vs LEN (54 vs 85)                                    | 21.7 vs 12.8,<br>(P=0.0051)        | 11.3 vs 6.6,<br>(P=0.0128)  | 38.9 vs 24.7,<br>(P=0.076)   | 92.6 vs 74.1,<br>(P=0.006)   | mRECIST                  | [107] |
| LEN+PD-1 vs LEN group (40 vs 47)                                    | 22.9 vs 10.3,<br>(P=0.01)          | 7.5 vs 4.8,<br>(P=0.05)     | 45.0 vs 23.4,<br>(P=0.03)    | 83.5 vs 76.6,<br>(P=0.5)     | RECIST<br>v.1.1 criteria | [108] |
| LEN+PD-1 vs REG+PD-1 (32 vs 29)                                     | 5.3 vs 4.0,<br>(P=0.512)           | 14.1 vs 13.7,<br>(P=0.764)  | 12.5 vs 10.3,<br>(P=0.557)   | 71.9 vs 58.6,<br>(P=0.207)   |                          | [113] |
| LEN+PD-1 vs PD-1 (30 vs 39)                                         | 18.4 vs 8.5,<br>(P=0.013)          | 10.6 vs 4.4,<br>(P<0.001)   | 32.7 vs 10.3,<br>(P=0.013)   | 80.0 vs 53.8,<br>(P=0.012)   |                          | [115] |
| LEN+PD-1+TACE vs LEN+TACE (41 vs 40)                                | 16.9 vs 12.1,<br>(P=0.009)         | 7.3 vs 4.0,<br>(P=0.002)    | 56.1 vs 32.5,<br>(P=0.033)   | 85.4 vs 62.5,<br>(P=0.019)   | mRECIST                  | [146] |
| LEN+PD-1+TACE vs LEN+TACE (33 vs 49)                                | 16.4 vs 11.0,<br>(P<0.01)          | 9.4 vs 5.9,<br>(P<0.01)     | 51.7 vs 47.9,<br>(P>0.05)    | 81.8 vs 77.6,<br>(P=0.429)   |                          | [147] |
| LEN+PD-1+TACE vs LEN+TACE (31 vs 52)                                | 18.9 vs 13.9,<br>(P<0.001)         | 12.5 vs 6.6,<br>(P<0.001)   | 71.0 vs 42.3,<br>(P=0.023)   | 93.5 vs 80.8,<br>(P=0.195)   |                          | [148] |
| LEN+PD-1+TACE vs LEN+PD-1 (60 vs 58)                                | 29.0 vs 17.8,<br>(P<0.01)          | 16.2 vs 10.2,<br>(P<0.01)   | 76.7 vs 44.9,<br>(P<0.01)    | 96.7 vs 75.9,<br>(P<0.01)    |                          | [152] |
| LEN+PD-1+TACE vs LEN+PD-1 (86 vs 86)                                | 20.5 vs 12.8,<br>(P=0.013)         | 12.1 vs 7.8,<br>(P=0.030)   | 55.8 vs 30.2,<br>(P=0.017)   | 86.0 vs 65.1,<br>(P=0.024)   |                          | [153] |
| LEN+PD-1+TACE vs LEN+PD-1 (75 vs 39)                                | not reached vs 14.0,<br>(P=0.0039) | 11.1 vs 5.1,<br>(P=0.033)   | 44.0 vs 23.1,<br>(P=0.028)   | 62.7 vs 43.6,<br>(P=0.051)   |                          | [154] |
| LEN+PD-1+TACE vs SOR+PD-1+TACE (80 vs 85)                           | 21.7 vs 15.6,<br>(P=0.0027)        | 6.3 vs 3.2,<br>(P<0.001)    | 41.25 vs 30.59,<br>(P=0.008) | 86.25 vs 62.35,<br>(P=0.008) |                          | [156] |
| LEN+PD-1+TACE vs PD-1+TACE (57 vs 41)                               | 19.8 vs 15.7,<br>(P<0.001)         | 11.4 vs 8.4,<br>(P<0.001)   | 57.9 vs 41.5,<br>(P=0.108)   | 75.4 vs 58.5,<br>(P=0.076)   |                          | [157] |
| LEN+PD-1+TACE vs TACE (57 vs 43)                                    | 19.8 vs 9.4,<br>(P<0.001)          | 11.4 vs 4.8,<br>(P<0.001)   | 57.9 vs 32.6,<br>(P=0.012)   | 75.4 vs 55.8,<br>(P=0.039)   |                          | [157] |
| LEN+PD-1+TACE vs PD-1+TACE (56 vs 47)                               | 26.0 vs not reached,<br>(P=0.0045) | 22.5 vs 14.0,<br>(P=0.0013) | 64.3 vs 38.3,<br>(P=0.010)   | 85.7 vs 57.4,<br>(P=0.002)   |                          | [158] |
| LEN+PD-1+TACE vs TACE (56 vs 54)                                    | 23.9 vs 15.3,<br>(P<0.001)         | 11.9 vs 6.9,<br>(P=0.003)   | 67.9 vs 29.6,<br>(P<0.001)   | 92.9 vs 83.3,<br>(P=0.122)   |                          | [159] |
| LEN+PD-1+TACE vs LEN+TACE (23 vs 29)                                | 26.7 vs 14.4,<br>(P=0.007)         | 8.2 vs 6.0,<br>(P=0.005)    | 86.96 vs 34.48,<br>(P<0.001) | 100 vs 48.28,<br>(P<0.001)   |                          | [160] |
| LEN+PD-1+TACE vs SOR+TACE (23 vs 32)                                | 26.7 vs 17.9,<br>(P=0.031)         | 8.2 vs 6.6,<br>(P=0.047)    | 86.96 vs 46.88,<br>(P<0.001) | 100 vs 75,<br>(P<0.001)      |                          | [160] |
